# Supplementary material for: Porphyrin nanotubes composed of highly ordered molecular arrays prepared by anodic aluminum template method
Source: Royal Society of Chemistry journal article supplement (doi:10.1039/c2ra21364h), 2012-12-18
Supplement: c2ra21364h.pdf [file c2ra21364h.pdf]

## Porphyrin Nanotubes Composed of Highly Ordered Molecular Arrays Prepared by Anodic Aluminum Template Method

Qingyun Liu,<sup>\*a,b</sup> Jiqin Zhu,<sup>b</sup> Tao Sun,<sup>b</sup> Hangyue Zhou,<sup>b</sup> Qian Shao,<sup>b</sup> Guijiang Li,<sup>b</sup>  
Xiaodong Liu,<sup>b</sup> and Yansheng Yin,<sup>\*a,c</sup>

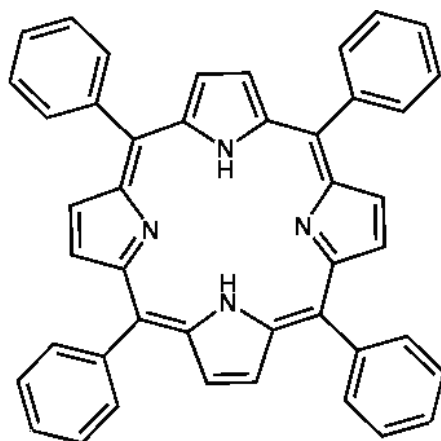

Figure S1. The molecular structure of 5,10,15,20-tetraphenyl porphyrin ( $H_2TPP$ ).

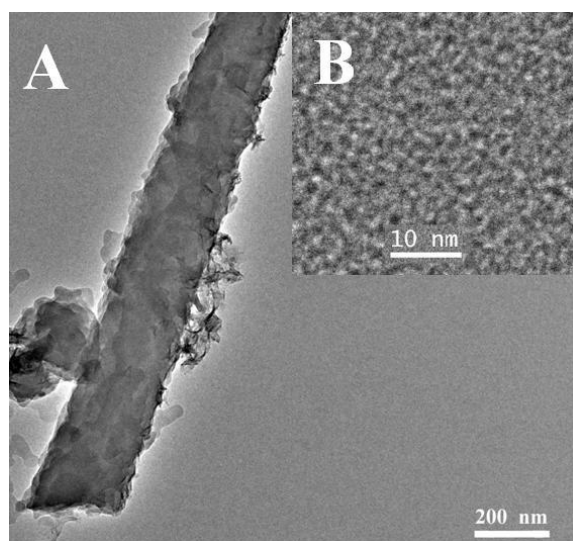

Figure S2. (A) TEM image of  $H_2TPP$  nanostructure by AAO template. (B) The HRTEM image of the tube wall.
